# Supplementary material for: Aspects de l'intégration socio-économique des handicapés mentaux
Source: Royal Society of Chemistry journal article supplement (doi:10.1039/d0cp05609j), 1981-01-01
Supplement: d0cp05609j1.pdf [file d0cp05609j1.pdf]

# Electronic Supplementary Information: Ultrafast Excited-State Dynamics of Promising Nucleobase Ancestor 2,4,6-Triaminopyrimidine

Conor D. Rankine

Oct. 2020

Table S1: Optimised Cartesian coordinates in Å and energy,  $E$ , in atomic units (a.u.) for the  $S_0$  minimum-energy geometry of TAP at the SA5-CASSCF(10,8)/*def2*-SV(P) level

| $E = -427.532899825$ |           |           |           |
|----------------------|-----------|-----------|-----------|
| N                    | -0.676279 | -0.004583 | -1.182556 |
| N                    | -0.676279 | -0.004585 | 1.182556  |
| N                    | 1.264601  | 0.046540  | -2.422370 |
| N                    | 1.264602  | 0.046541  | 2.422371  |
| N                    | -2.651212 | 0.048845  | -0.000000 |
| C                    | -1.278311 | 0.005441  | 0.000000  |
| C                    | 1.385743  | 0.017123  | -0.000000 |
| C                    | 0.648870  | 0.007873  | -1.188596 |
| C                    | 0.648871  | 0.007874  | 1.188596  |
| H                    | 2.192724  | -0.318867 | -2.480882 |
| H                    | 2.192725  | -0.318867 | 2.480882  |
| H                    | 0.672652  | -0.199691 | -3.190563 |
| H                    | 0.672653  | -0.199690 | 3.190563  |
| H                    | -3.100591 | -0.225345 | -0.848702 |
| H                    | -3.100592 | -0.225347 | 0.848701  |
| H                    | 2.466048  | 0.048286  | -0.000000 |

Table S2: Optimised Cartesian coordinates in Å and energy,  $E$ , in atomic units (a.u.) for the  $S_0$  minimum-energy geometry of TAP at the SA5-CASSCF(16,11)/*def2*-SV(P) level

| $E = -427.538788521$ |           |           |           |
|----------------------|-----------|-----------|-----------|
| N                    | -0.679565 | -0.006038 | -1.183331 |
| N                    | -0.679565 | -0.006049 | 1.183331  |
| N                    | 1.259169  | 0.044489  | -2.418211 |
| N                    | 1.259170  | 0.044491  | 2.418211  |
| N                    | -2.650097 | 0.045504  | 0.000000  |
| C                    | -1.281000 | 0.002455  | -0.000000 |
| C                    | 1.383592  | 0.011414  | 0.000000  |
| C                    | 0.645859  | 0.003944  | -1.188733 |
| C                    | 0.645859  | 0.003946  | 1.188733  |
| H                    | 2.199099  | -0.287264 | -2.481271 |
| H                    | 2.199100  | -0.287257 | 2.481271  |
| H                    | 0.672376  | -0.189467 | -3.193764 |
| H                    | 0.672377  | -0.189467 | 3.193764  |
| H                    | -3.105503 | -0.210227 | -0.850973 |
| H                    | -3.105503 | -0.210235 | 0.850971  |
| H                    | 2.464094  | 0.040899  | 0.000000  |

Table S3: Optimised Cartesian coordinates in Å and energy,  $E$ , in atomic units (a.u.) for the  $S_0$  minimum-energy geometry of TAP at the MR-CISD/*def2*-SV(P) level

| $E = -428.509673984$ |           |           |           |
|----------------------|-----------|-----------|-----------|
| N                    | -0.678640 | -0.007701 | -1.184013 |
| N                    | -0.678639 | -0.007697 | 1.184013  |
| N                    | 1.256588  | 0.043545  | -2.410576 |
| N                    | 1.256588  | 0.043544  | 2.410576  |
| N                    | -2.635350 | 0.038106  | 0.000000  |
| C                    | -1.275072 | 0.000687  | 0.000000  |
| C                    | 1.385301  | 0.012926  | -0.000000 |
| C                    | 0.649391  | 0.003531  | -1.184067 |
| C                    | 0.649391  | 0.003529  | 1.184067  |
| H                    | 2.205859  | -0.276314 | -2.477868 |
| H                    | 2.205858  | -0.276317 | 2.477869  |
| H                    | 0.660761  | -0.185110 | -3.187742 |
| H                    | 0.660761  | -0.185110 | 3.187742  |
| H                    | -3.100727 | -0.178110 | -0.862084 |
| H                    | -3.100726 | -0.178106 | 0.862085  |
| H                    | 2.469544  | 0.044051  | -0.000000 |

Table S4: Optimised Cartesian coordinates in Å and energy,  $E$ , in atomic units (a.u.) for the  $\pi\pi^*$   $S_1$  minimum-energy geometry of TAP at the SA5-CASSCF(10,8)/*def2*-SV(P) level

| $E = -427.340374627$ |           |           |           |
|----------------------|-----------|-----------|-----------|
| N                    | -0.700844 | -0.009324 | -1.216046 |
| N                    | -0.700844 | -0.009324 | 1.216046  |
| N                    | 1.287626  | 0.073730  | -2.466133 |
| N                    | 1.287626  | 0.073730  | 2.466133  |
| N                    | -2.669212 | 0.060588  | 0.000000  |
| C                    | -1.300747 | 0.002462  | -0.000000 |
| C                    | 1.406580  | 0.031470  | -0.000000 |
| C                    | 0.663916  | -0.011544 | -1.227787 |
| C                    | 0.663916  | -0.011544 | 1.227787  |
| H                    | 2.149924  | -0.430842 | -2.548580 |
| H                    | 2.149924  | -0.430842 | 2.548580  |
| H                    | 0.664957  | -0.120588 | -3.227223 |
| H                    | 0.664957  | -0.120587 | 3.227223  |
| H                    | -3.125043 | -0.202729 | -0.849339 |
| H                    | -3.125043 | -0.202729 | 0.849339  |
| H                    | 2.482801  | 0.122295  | -0.000000 |

Table S5: Optimised Cartesian coordinates in Å and energy,  $E$ , in atomic units (a.u.) for the  $\pi\pi^*$  S<sub>1</sub> minimum-energy geometry of TAP at the SA5-CASSCF(16,11)/*def2*-SV(P) level

| $E = -427.347859694$ |           |           |           |
|----------------------|-----------|-----------|-----------|
| N                    | -0.702391 | -0.008364 | -1.216057 |
| N                    | -0.702391 | -0.008363 | 1.216057  |
| N                    | 1.281753  | 0.091385  | -2.463256 |
| N                    | 1.281753  | 0.091385  | 2.463256  |
| N                    | -2.660670 | 0.057286  | -0.000000 |
| C                    | -1.297385 | 0.000660  | -0.000000 |
| C                    | 1.402999  | 0.025670  | 0.000000  |
| C                    | 0.662299  | -0.024326 | -1.226779 |
| C                    | 0.662299  | -0.024326 | 1.226779  |
| H                    | 2.168971  | -0.366539 | -2.548872 |
| H                    | 2.168971  | -0.366539 | 2.548872  |
| H                    | 0.669361  | -0.118162 | -3.228586 |
| H                    | 0.669361  | -0.118162 | 3.228586  |
| H                    | -3.129787 | -0.160050 | -0.854409 |
| H                    | -3.129787 | -0.160050 | 0.854409  |
| H                    | 2.479611  | 0.116956  | 0.000000  |

Table S6: Optimised Cartesian coordinates in Å and energy,  $E$ , in atomic units (a.u.) for the  $\pi\pi^*$  S<sub>1</sub> minimum-energy geometry of TAP at the MR-CISD/*def2*-SV(P) level

| $E = -428.265287580$ |           |           |           |
|----------------------|-----------|-----------|-----------|
| N                    | -0.708666 | -0.036852 | -1.198177 |
| N                    | -0.708666 | -0.036852 | 1.198177  |
| N                    | 1.255556  | 0.140293  | -2.461995 |
| N                    | 1.255556  | 0.140293  | 2.461995  |
| N                    | -2.608111 | 0.033946  | -0.000000 |
| C                    | -1.274067 | -0.011200 | 0.000000  |
| C                    | 1.409604  | 0.035218  | 0.000000  |
| C                    | 0.645303  | -0.035074 | -1.238186 |
| C                    | 0.645303  | -0.035074 | 1.238186  |
| H                    | 2.164304  | -0.284230 | -2.562920 |
| H                    | 2.164304  | -0.284231 | 2.562920  |
| H                    | 0.640724  | -0.069927 | -3.232916 |
| H                    | 0.640724  | -0.069927 | 3.232916  |
| H                    | -3.096219 | 0.088645  | -0.874140 |
| H                    | -3.096219 | 0.088645  | 0.874139  |
| H                    | 2.489079  | 0.136264  | 0.000000  |

Table S7: Optimised Cartesian coordinates in Å and energy,  $E$ , in atomic units (a.u.) for the  ${}^1\mathbf{S}_4$   $S_1/S_0$  minimum-energy crossing point of TAP at the SA5-CASSCF(10,8)/*def2*-SV(P) level

| $E = -427.355192344$ |           |           |           |
|----------------------|-----------|-----------|-----------|
| N                    | -0.710462 | -0.109370 | -1.068698 |
| N                    | -0.777975 | 0.115718  | 1.253632  |
| N                    | 1.215193  | -0.040547 | -2.452555 |
| N                    | 1.216000  | -0.157346 | 2.414550  |
| N                    | -1.086453 | 2.046168  | -0.118285 |
| C                    | -1.166688 | 0.643541  | -0.000543 |
| C                    | 1.298668  | 0.235791  | -0.003656 |
| C                    | 0.607911  | 0.109977  | -1.217015 |
| C                    | 0.510962  | 0.082387  | 1.252448  |
| H                    | 2.133383  | -0.440567 | -2.441951 |
| H                    | 2.058936  | -0.689462 | 2.321914  |
| H                    | 0.618612  | -0.470903 | -3.133773 |
| H                    | 0.639978  | -0.455558 | 3.178982  |
| H                    | -1.745418 | 2.416289  | -0.778189 |
| H                    | -1.169519 | 2.518672  | 0.762653  |
| H                    | 2.373662  | 0.124483  | 0.034393  |

Table S8: Optimised Cartesian coordinates in Å and energy,  $E$ , in atomic units (a.u.) for the  ${}^1\mathbf{H}_6$   $S_1/S_0$  minimum-energy crossing point of TAP at the SA5-CASSCF(10,8)/*def2*-SV(P) level

| $E = -427.356320661$ |           |           |           |
|----------------------|-----------|-----------|-----------|
| N                    | -1.156126 | 0.198825  | 0.697977  |
| N                    | 1.105858  | 0.501847  | 0.493772  |
| N                    | -1.554490 | 2.301370  | -0.280232 |
| N                    | 2.113612  | 0.290439  | -1.595946 |
| N                    | 0.161313  | 0.563557  | 2.633763  |
| C                    | 0.071054  | 0.493581  | 1.261703  |
| C                    | -0.317579 | 0.541214  | -1.473426 |
| C                    | -1.375934 | 0.917460  | -0.502493 |
| C                    | 0.916188  | 0.433410  | -0.907159 |
| H                    | -1.374745 | 2.867652  | -1.087612 |
| H                    | 2.030111  | -0.054761 | -2.531556 |
| H                    | -2.443440 | 2.536226  | 0.123320  |
| H                    | 2.824818  | -0.181460 | -1.071767 |
| H                    | -0.567239 | 0.081141  | 3.123735  |
| H                    | 1.078672  | 0.385890  | 2.994565  |
| H                    | -0.464396 | 0.583241  | -2.544519 |

Table S9: Optimised Cartesian coordinates in Å and energy,  $E$ , in atomic units (a.u.) for the  $\mathbf{E}_5$   $S_1/S_0$  minimum-energy crossing point of TAP at the SA5-CASSCF(10,8)/*def2*-SV(P) level

| $E = -427.302429857$ |           |           |           |
|----------------------|-----------|-----------|-----------|
| N                    | -0.964454 | 0.470353  | 0.935323  |
| N                    | 1.309283  | 0.304956  | 0.798673  |
| N                    | -1.756382 | -0.138646 | -1.211428 |
| N                    | 1.727682  | -0.460657 | -1.407007 |
| N                    | 0.307901  | 0.527518  | 2.922012  |
| C                    | 0.209054  | 0.415600  | 1.551521  |
| C                    | 0.157954  | 1.461529  | -1.052859 |
| C                    | -0.731978 | 0.470017  | -0.463463 |
| C                    | 0.918457  | 0.324475  | -0.567317 |
| H                    | -1.572131 | -0.194967 | -2.194007 |
| H                    | 1.407410  | -0.509530 | -2.354695 |
| H                    | -2.038212 | -1.030034 | -0.845628 |
| H                    | 1.906311  | -1.378113 | -1.040326 |
| H                    | -0.531926 | 0.308386  | 3.419571  |
| H                    | 1.137968  | 0.134644  | 3.318793  |
| H                    | 0.112469  | 1.643452  | -2.122402 |

Table S10: Optimised Cartesian coordinates in Å and energy,  $E$ , in atomic units (a.u.) for the  $\mathbf{B}_{4,5}$   $S_1/S_0$  minimum-energy crossing point of TAP at the SA5-CASSCF(10,8)/*def2*-SV(P) level

| $E = -427.357276630$ |           |           |           |
|----------------------|-----------|-----------|-----------|
| N                    | -0.742370 | 0.073277  | -1.229004 |
| N                    | -0.743757 | 0.085033  | 1.206547  |
| N                    | 1.344343  | -0.181477 | -2.291726 |
| N                    | 1.342240  | -0.157224 | 2.275379  |
| N                    | -2.351183 | 1.367364  | -0.016427 |
| C                    | -1.130580 | 0.739372  | -0.014527 |
| C                    | 1.086076  | 0.842342  | -0.013569 |
| C                    | 0.529147  | 0.213658  | -1.250782 |
| C                    | 0.527892  | 0.226087  | 1.229493  |
| H                    | 2.244826  | -0.538198 | -2.037490 |
| H                    | 2.246127  | -0.509333 | 2.027440  |
| H                    | 0.880893  | -0.739041 | -2.984258 |
| H                    | 0.880546  | -0.709802 | 2.972978  |
| H                    | -2.878528 | 1.305425  | -0.864166 |
| H                    | -2.886535 | 1.294505  | 0.825521  |
| H                    | 1.966222  | 1.472537  | -0.016327 |

Table S11: Optimised Cartesian coordinates in Å and energy,  $E$ , in atomic units (a.u.) for the  $\mathbf{B}_{1,6'}$   $S_1/S_0$  minimum-energy crossing point of TAP at the SA5-CASSCF(10,8)/*def2*-SV(P) level

| $E = -427.337093549$ |           |           |           |
|----------------------|-----------|-----------|-----------|
| N                    | -0.724337 | 0.159893  | -1.267609 |
| N                    | -0.490191 | 0.948704  | 0.862830  |
| N                    | 1.186682  | 1.228712  | -2.250773 |
| N                    | 0.971462  | -0.164722 | 2.448077  |
| N                    | -2.511109 | -0.182849 | 0.248567  |
| C                    | -1.266168 | 0.261296  | -0.131727 |
| C                    | 1.416518  | 0.126911  | -0.015051 |
| C                    | 0.589551  | 0.719649  | -1.107610 |
| C                    | 0.715171  | 0.214200  | 1.133426  |
| H                    | 2.139561  | 0.964701  | -2.414599 |
| H                    | 1.774698  | -0.756685 | 2.541012  |
| H                    | 0.616328  | 1.165084  | -3.072043 |
| H                    | 0.182822  | -0.560348 | 2.926266  |
| H                    | -2.894725 | -0.915183 | -0.314777 |
| H                    | -2.688466 | -0.267445 | 1.228315  |
| H                    | 2.392656  | -0.324958 | -0.143309 |

Table S12: Optimised Cartesian coordinates in Å and energy,  $E$ , in atomic units (a.u.) for the  $n\pi^*$   $S_1$  minimum-energy geometry of TAP at the SA5-CASSCF(10,8)/*def2*-SV(P) level

| $E = -427.340993452$ |           |           |           |
|----------------------|-----------|-----------|-----------|
| N                    | 2.336584  | 0.025394  | 1.227754  |
| N                    | 1.083963  | 0.039388  | -0.624183 |
| N                    | 1.485144  | -0.099753 | 3.371157  |
| N                    | -1.221687 | -0.073765 | -0.649944 |
| N                    | 3.391450  | 0.497582  | -0.903304 |
| C                    | 2.264640  | 0.546303  | -0.076073 |
| C                    | -0.028198 | 0.006268  | 1.469498  |
| C                    | 1.271179  | -0.019242 | 2.015430  |
| C                    | -0.051027 | -0.007565 | 0.063660  |
| H                    | 0.786188  | -0.571046 | 3.908713  |
| H                    | -1.989751 | -0.543725 | -0.215913 |
| H                    | 2.423950  | -0.310281 | 3.645355  |
| H                    | -1.124169 | -0.255140 | -1.628827 |
| H                    | 4.170629  | 0.971466  | -0.484779 |
| H                    | 3.662663  | -0.446065 | -1.136024 |
| H                    | -0.922389 | 0.044022  | 2.072886  |

Table S13: Optimised Cartesian coordinates in Å and energy,  $E$ , in atomic units (a.u.) for the  $n\pi^*$  S<sub>1</sub> minimum-energy geometry of TAP at the SA5-CASSCF(16,11)/*def2*-SV(P) level

| $E = -427.347822717$ |           |           |           |
|----------------------|-----------|-----------|-----------|
| N                    | 2.340786  | 0.001544  | 1.224420  |
| N                    | 1.088860  | 0.021226  | -0.631127 |
| N                    | 1.488838  | -0.115958 | 3.359876  |
| N                    | -1.207956 | -0.095370 | -0.648222 |
| N                    | 3.384481  | 0.528359  | -0.898020 |
| C                    | 2.255067  | 0.550731  | -0.071619 |
| C                    | -0.025269 | 0.030751  | 1.468039  |
| C                    | 1.271460  | -0.023941 | 2.013214  |
| C                    | -0.045720 | -0.011372 | 0.061808  |
| H                    | 0.762757  | -0.504845 | 3.925194  |
| H                    | -2.010001 | -0.483059 | -0.196638 |
| H                    | 2.420969  | -0.337340 | 3.646077  |
| H                    | -1.125998 | -0.281952 | -1.627024 |
| H                    | 4.165401  | 0.978017  | -0.456506 |
| H                    | 3.649077  | -0.407633 | -1.166335 |
| H                    | -0.920135 | 0.072220  | 2.070506  |

Table S14: Optimised Cartesian coordinates in Å and energy,  $E$ , in atomic units (a.u.) for the  $n\pi^*$  S<sub>1</sub> minimum-energy geometry of TAP at the MR-CISD/*def2*-SV(P) level

| $E = -428.300524771$ |           |           |           |
|----------------------|-----------|-----------|-----------|
| N                    | 2.329631  | -0.068752 | 1.206273  |
| N                    | 1.106328  | -0.043989 | -0.610585 |
| N                    | 1.489895  | -0.132483 | 3.333614  |
| N                    | -1.175550 | -0.123167 | -0.640023 |
| N                    | 3.360631  | 0.607609  | -0.889341 |
| C                    | 2.240935  | 0.552278  | -0.060846 |
| C                    | -0.021660 | 0.077890  | 1.466880  |
| C                    | 1.265566  | -0.031657 | 2.002996  |
| C                    | -0.032953 | -0.021463 | 0.069345  |
| H                    | 0.740183  | -0.411164 | 3.939386  |
| H                    | -2.032482 | -0.368036 | -0.180656 |
| H                    | 2.426725  | -0.341141 | 3.630279  |
| H                    | -1.107466 | -0.270395 | -1.631091 |
| H                    | 4.145503  | 1.018853  | -0.406735 |
| H                    | 3.622684  | -0.310422 | -1.236659 |
| H                    | -0.919935 | 0.144732  | 2.069042  |
